# Supplementary material
Source: publisher figshare collection journal article supplement (https://tandf.figshare.com/ndownloader/files/13176476)
Supplement: Supplementary file 1 [file 13176476]

Supporting Information

**Effervescent-Assisted Dispersive Liquid-Liquid Microextraction Based on the Solidification of Floating Organic Droplet for the Determination of Fungicides in Vinegar and Juice**

Xu Jing1,2, Jiaying Zhang1, Junling Zhu1, Zhenjia Chen1, Li Yi1, Xiaowen Wang1,2,*

1 College of Food Science and Engineering, Shanxi Agricultural University, Taigu, Shanxi 030801, P.R. China

2 Shanxi Functional Food Research Institute, Taigu, Shanxi 030801, P.R. China

*Corresponding author:

Xiaowen Wang, College of Food Science and Engineering, Shanxi Agricultural University, Shanxi 030801, P.R. China; Tel: +86-0354-6289670; E-mail: [wwxw11@163.com](mailto:wwxw11@163.com)

Number of Pages: 6

Number of Figures: 5


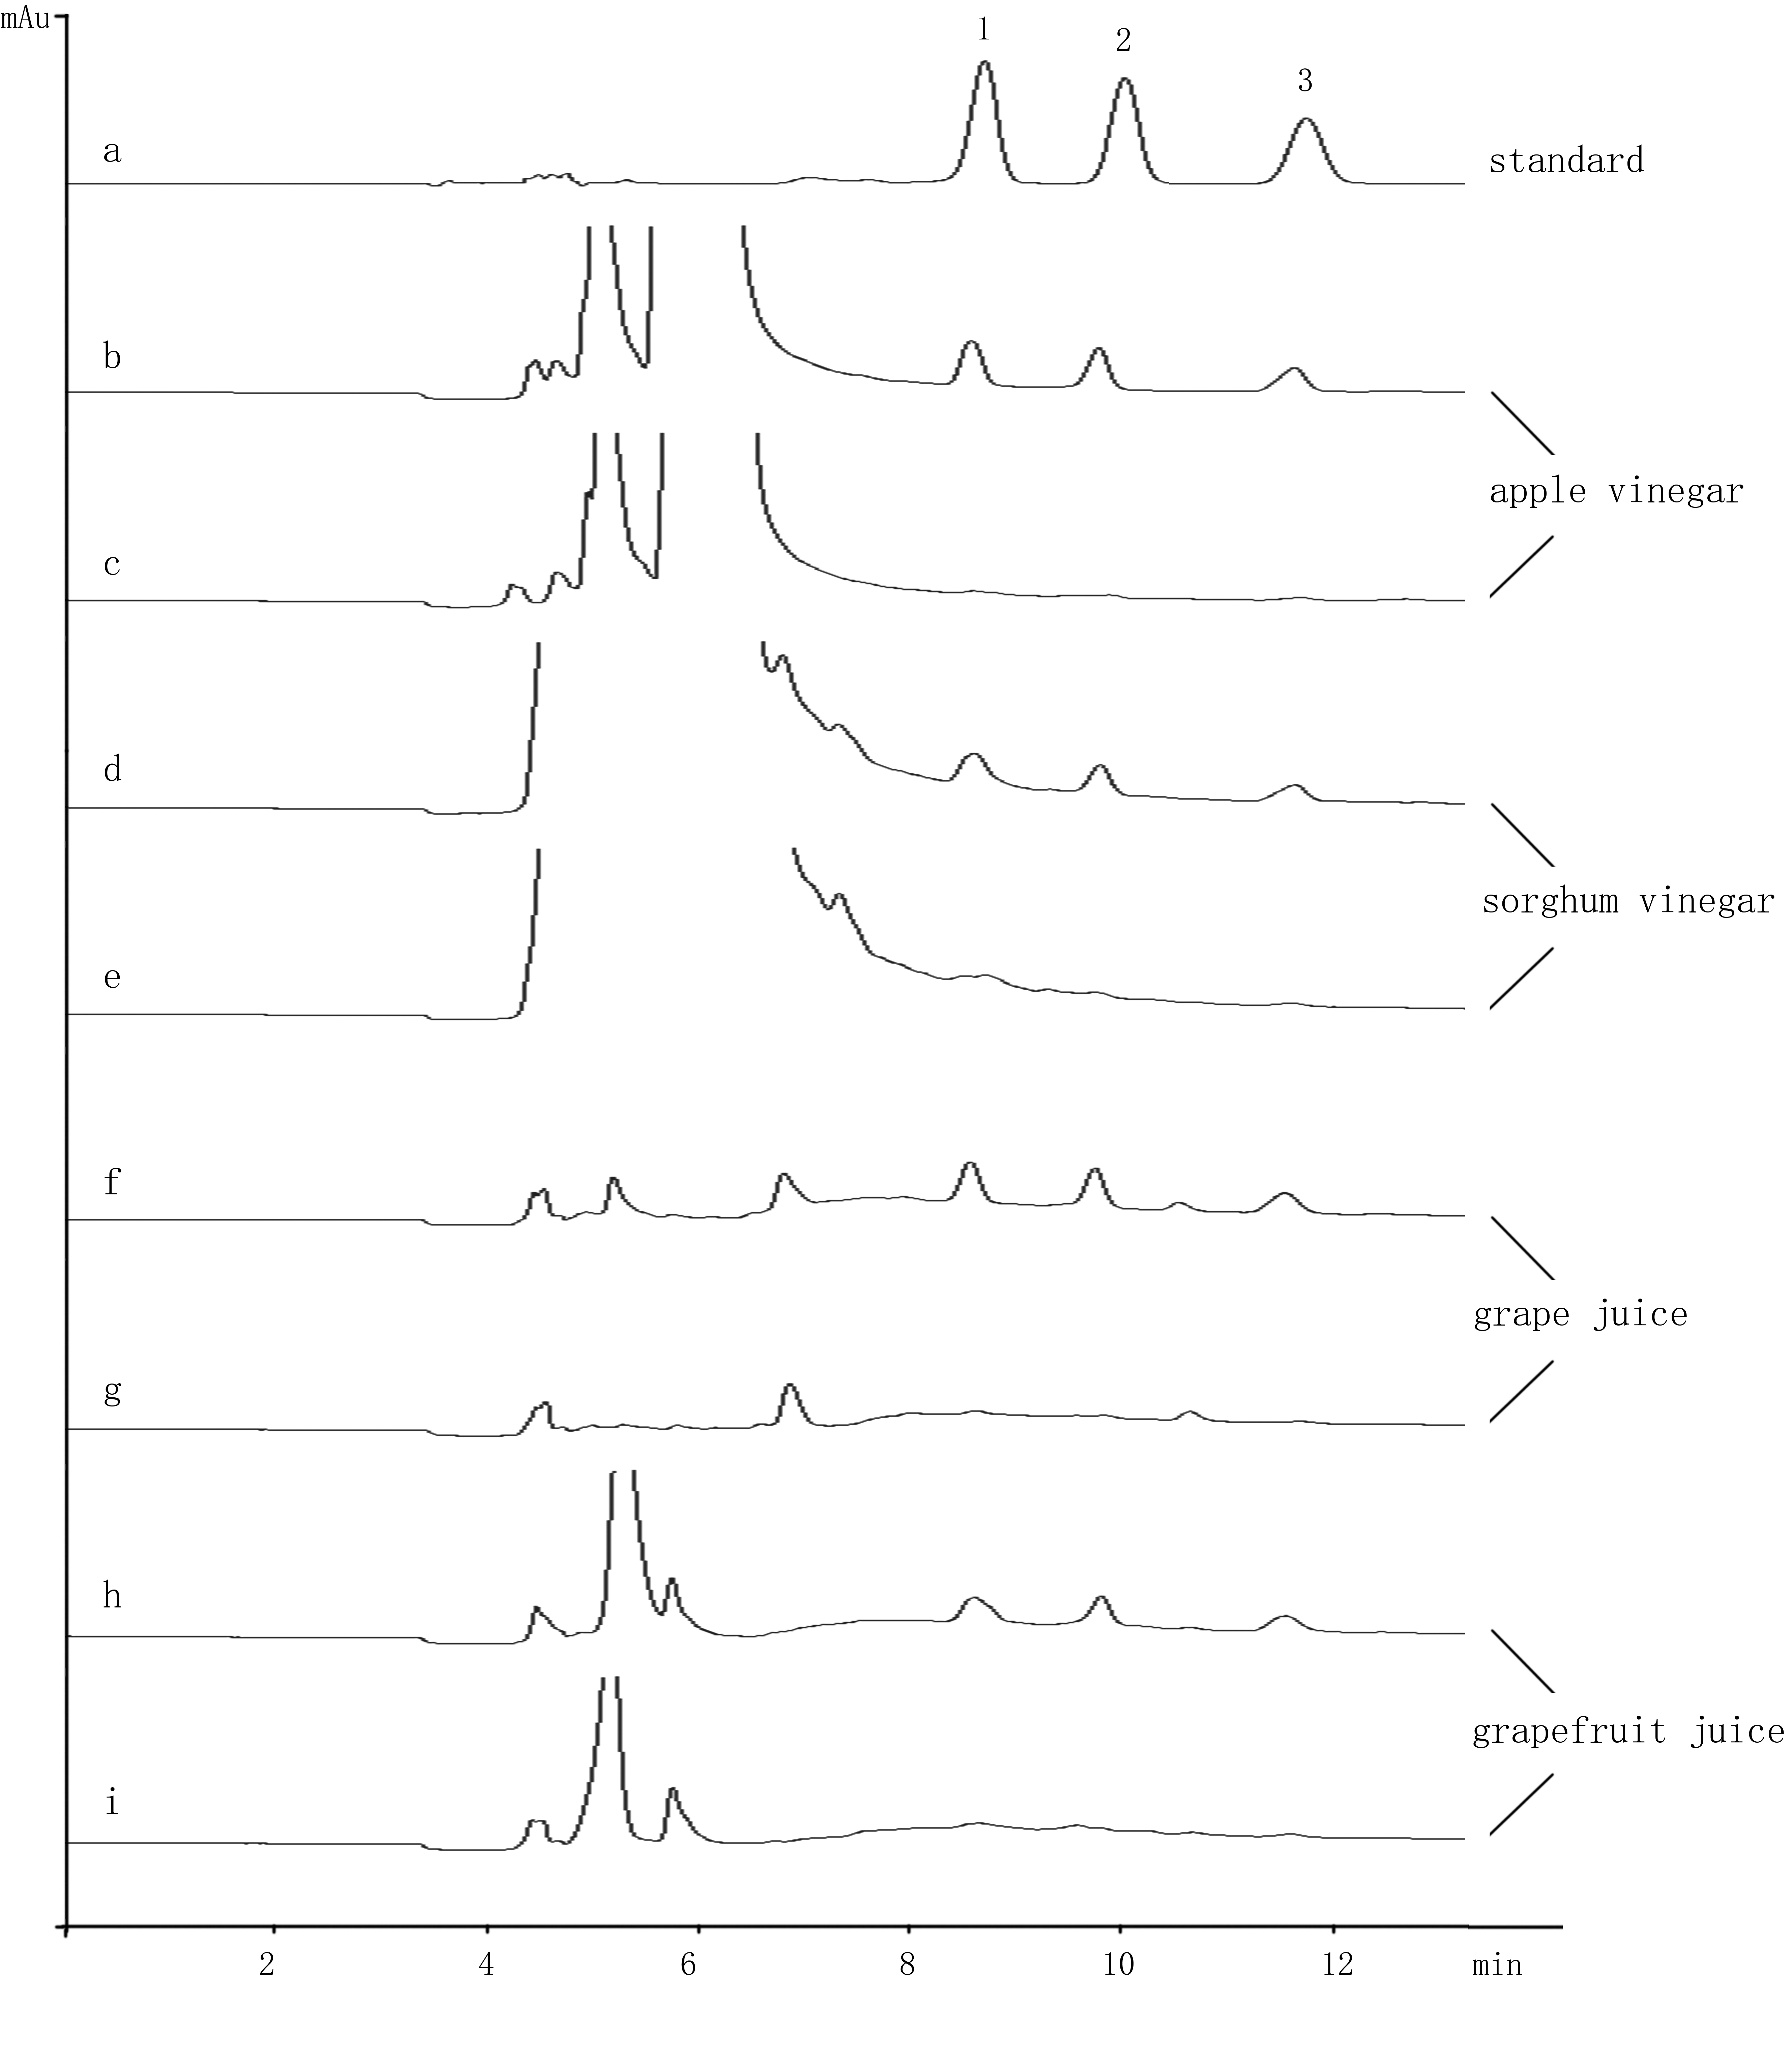


**Figure S1** The chromatograms of (a) a standard mixture at 2500 ng mL−1, (b, d, f, h) samples spiked with 100 ng mL−1 of fungicides and (c, e, g, i) blank samples. Peak identification: 1, myclobutanil; 2, epoxiconazole; and 3, tebuconazole.


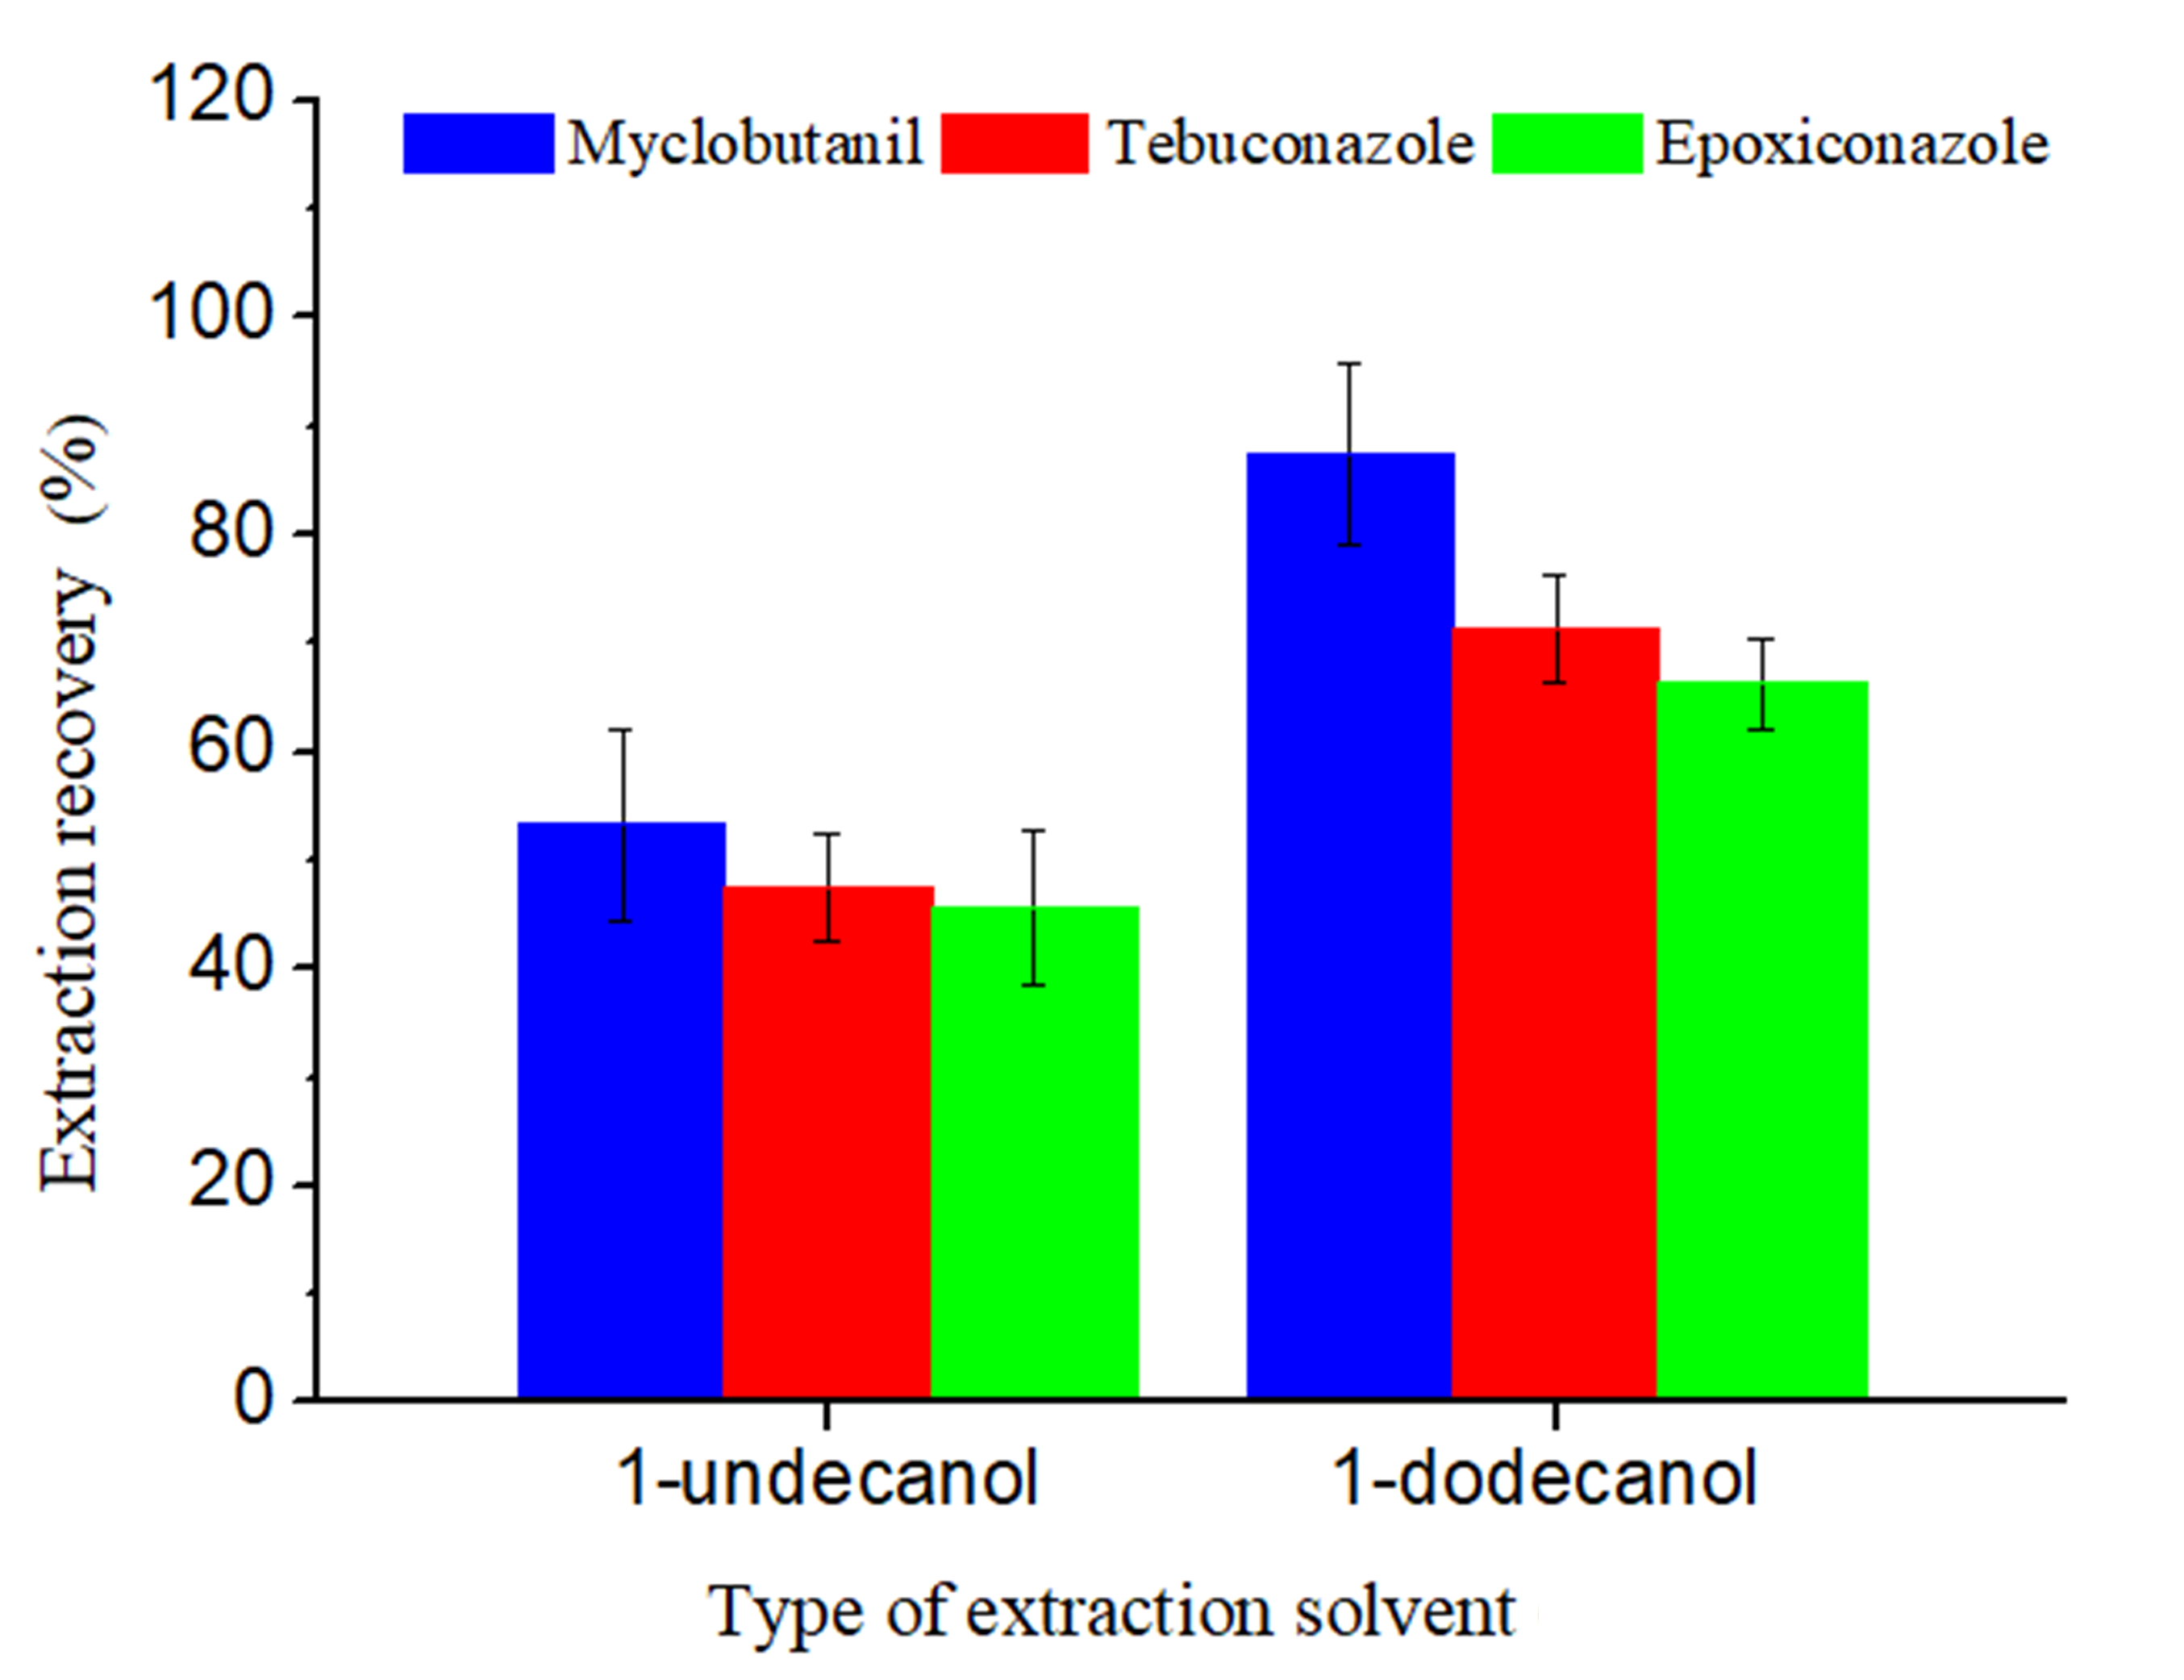


**Figure S2** Effect of extraction solvent on recovery.

**
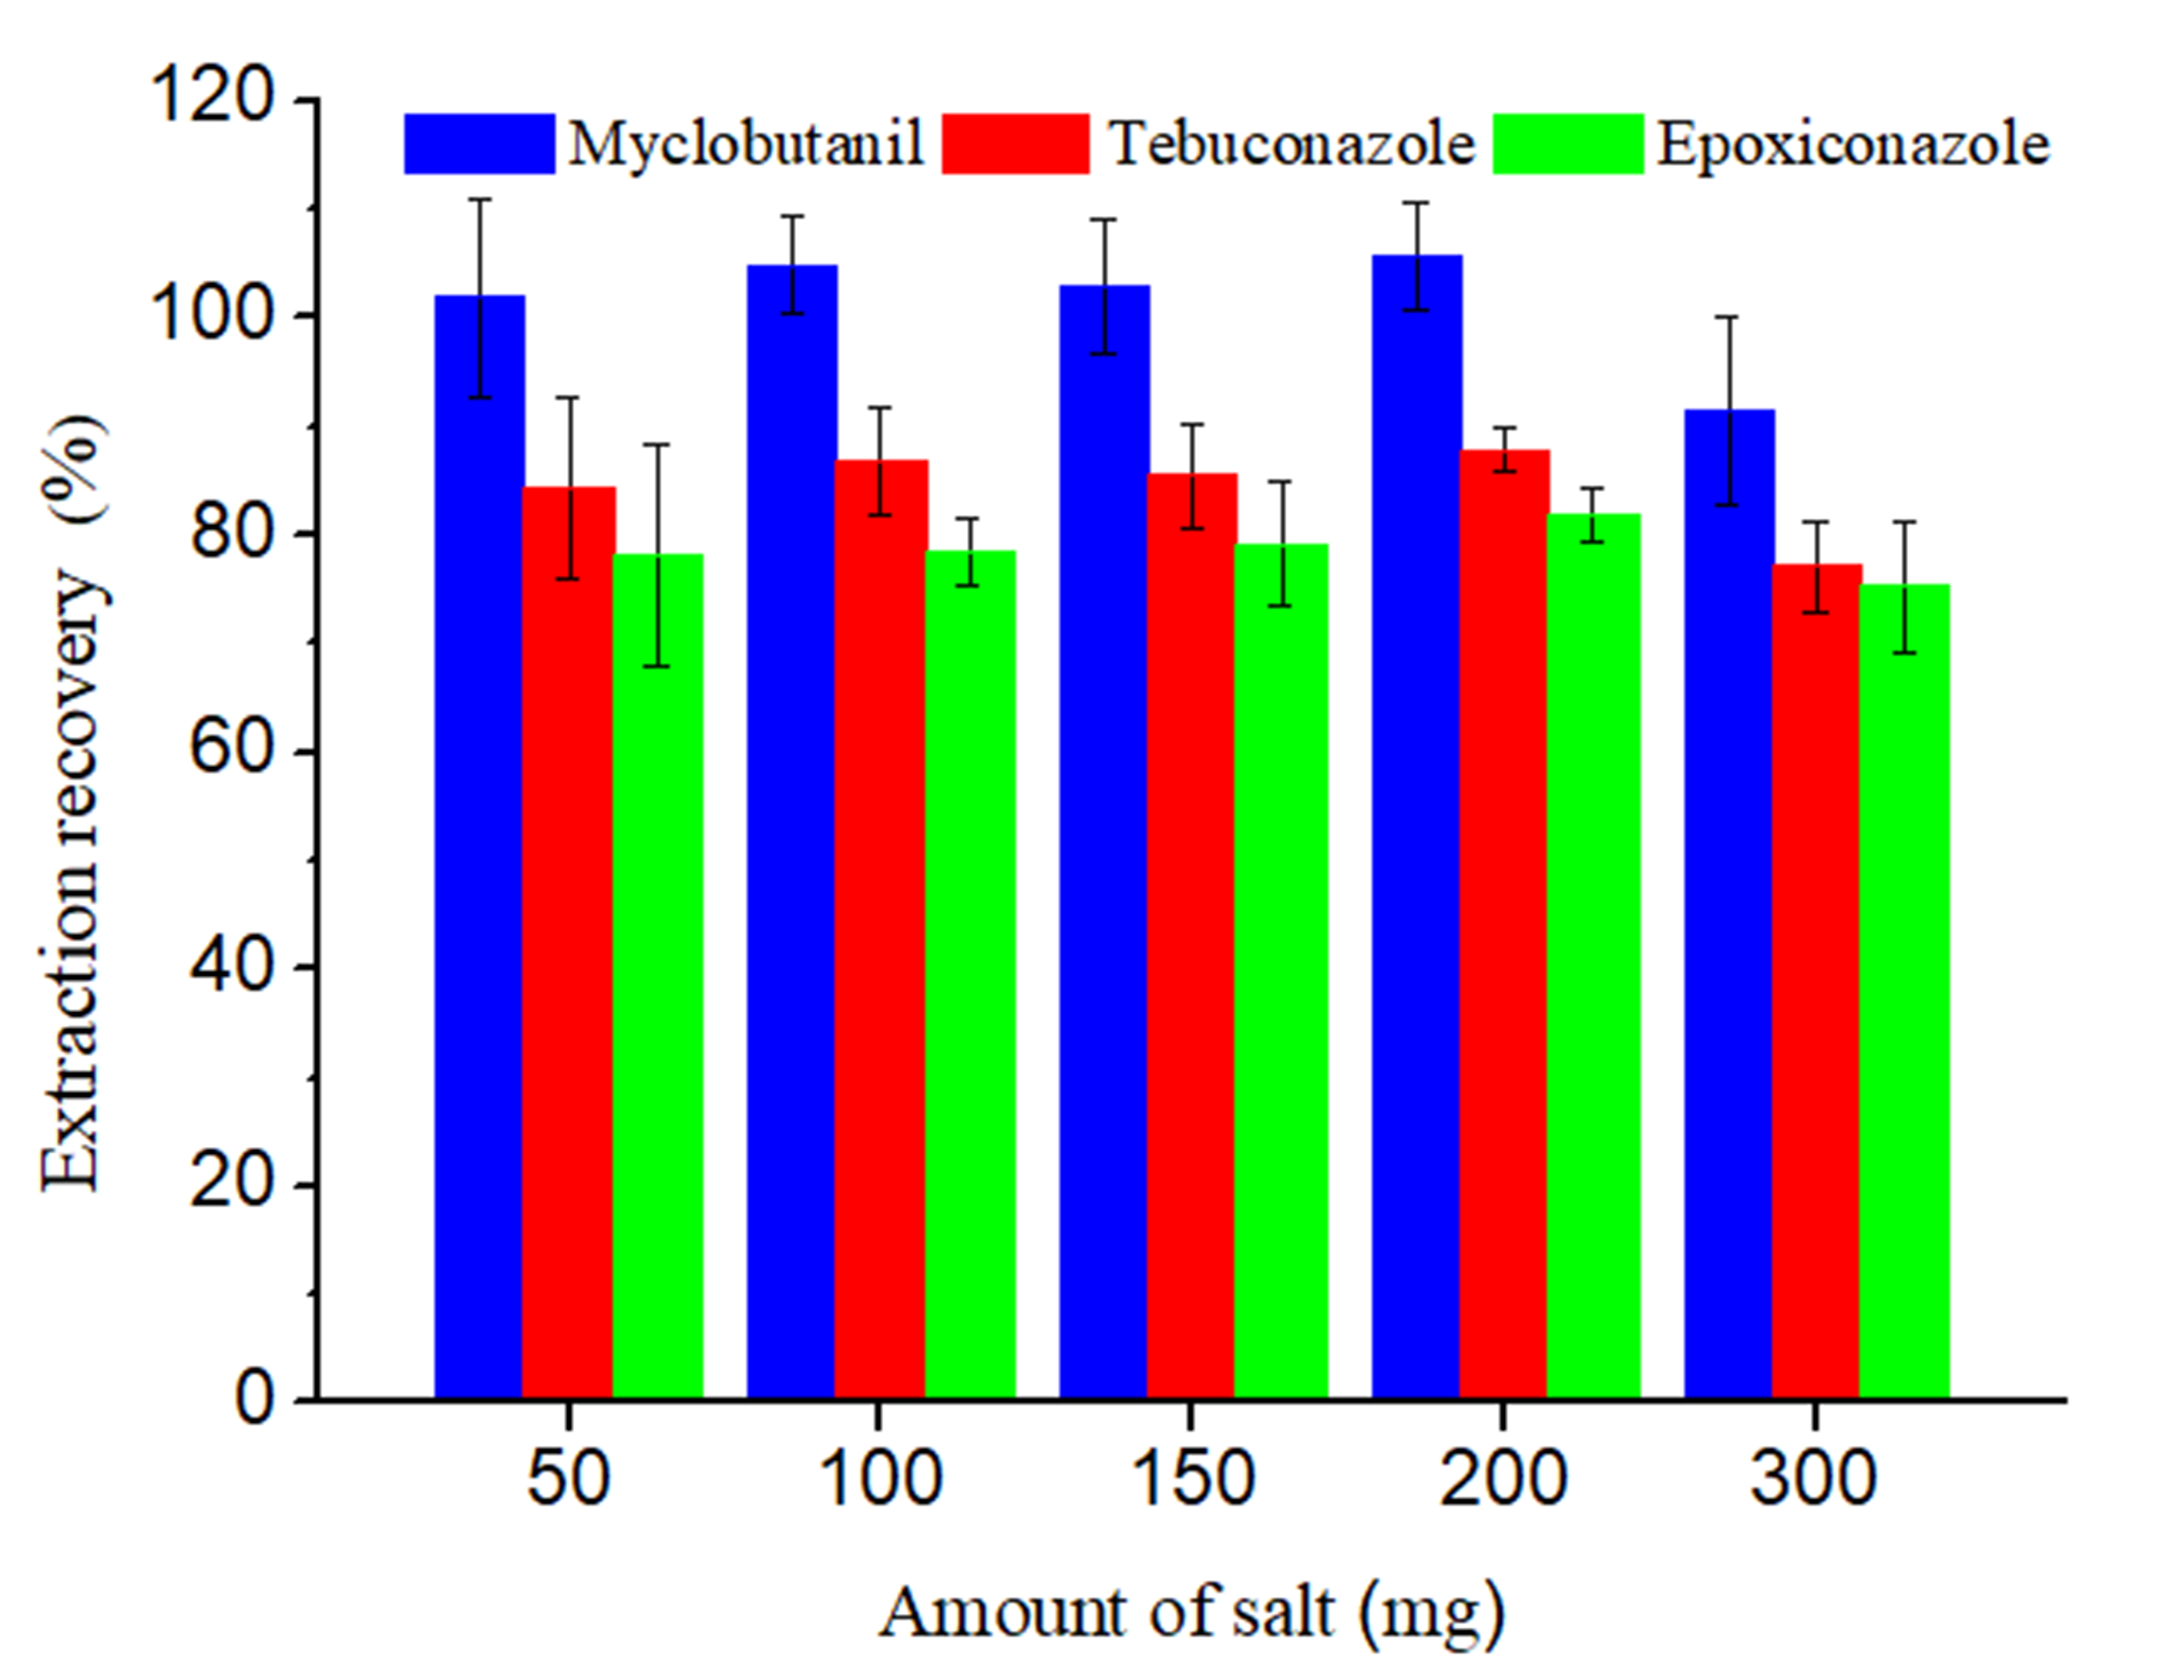
**

**Figure S3** Effect of salt on recovery.


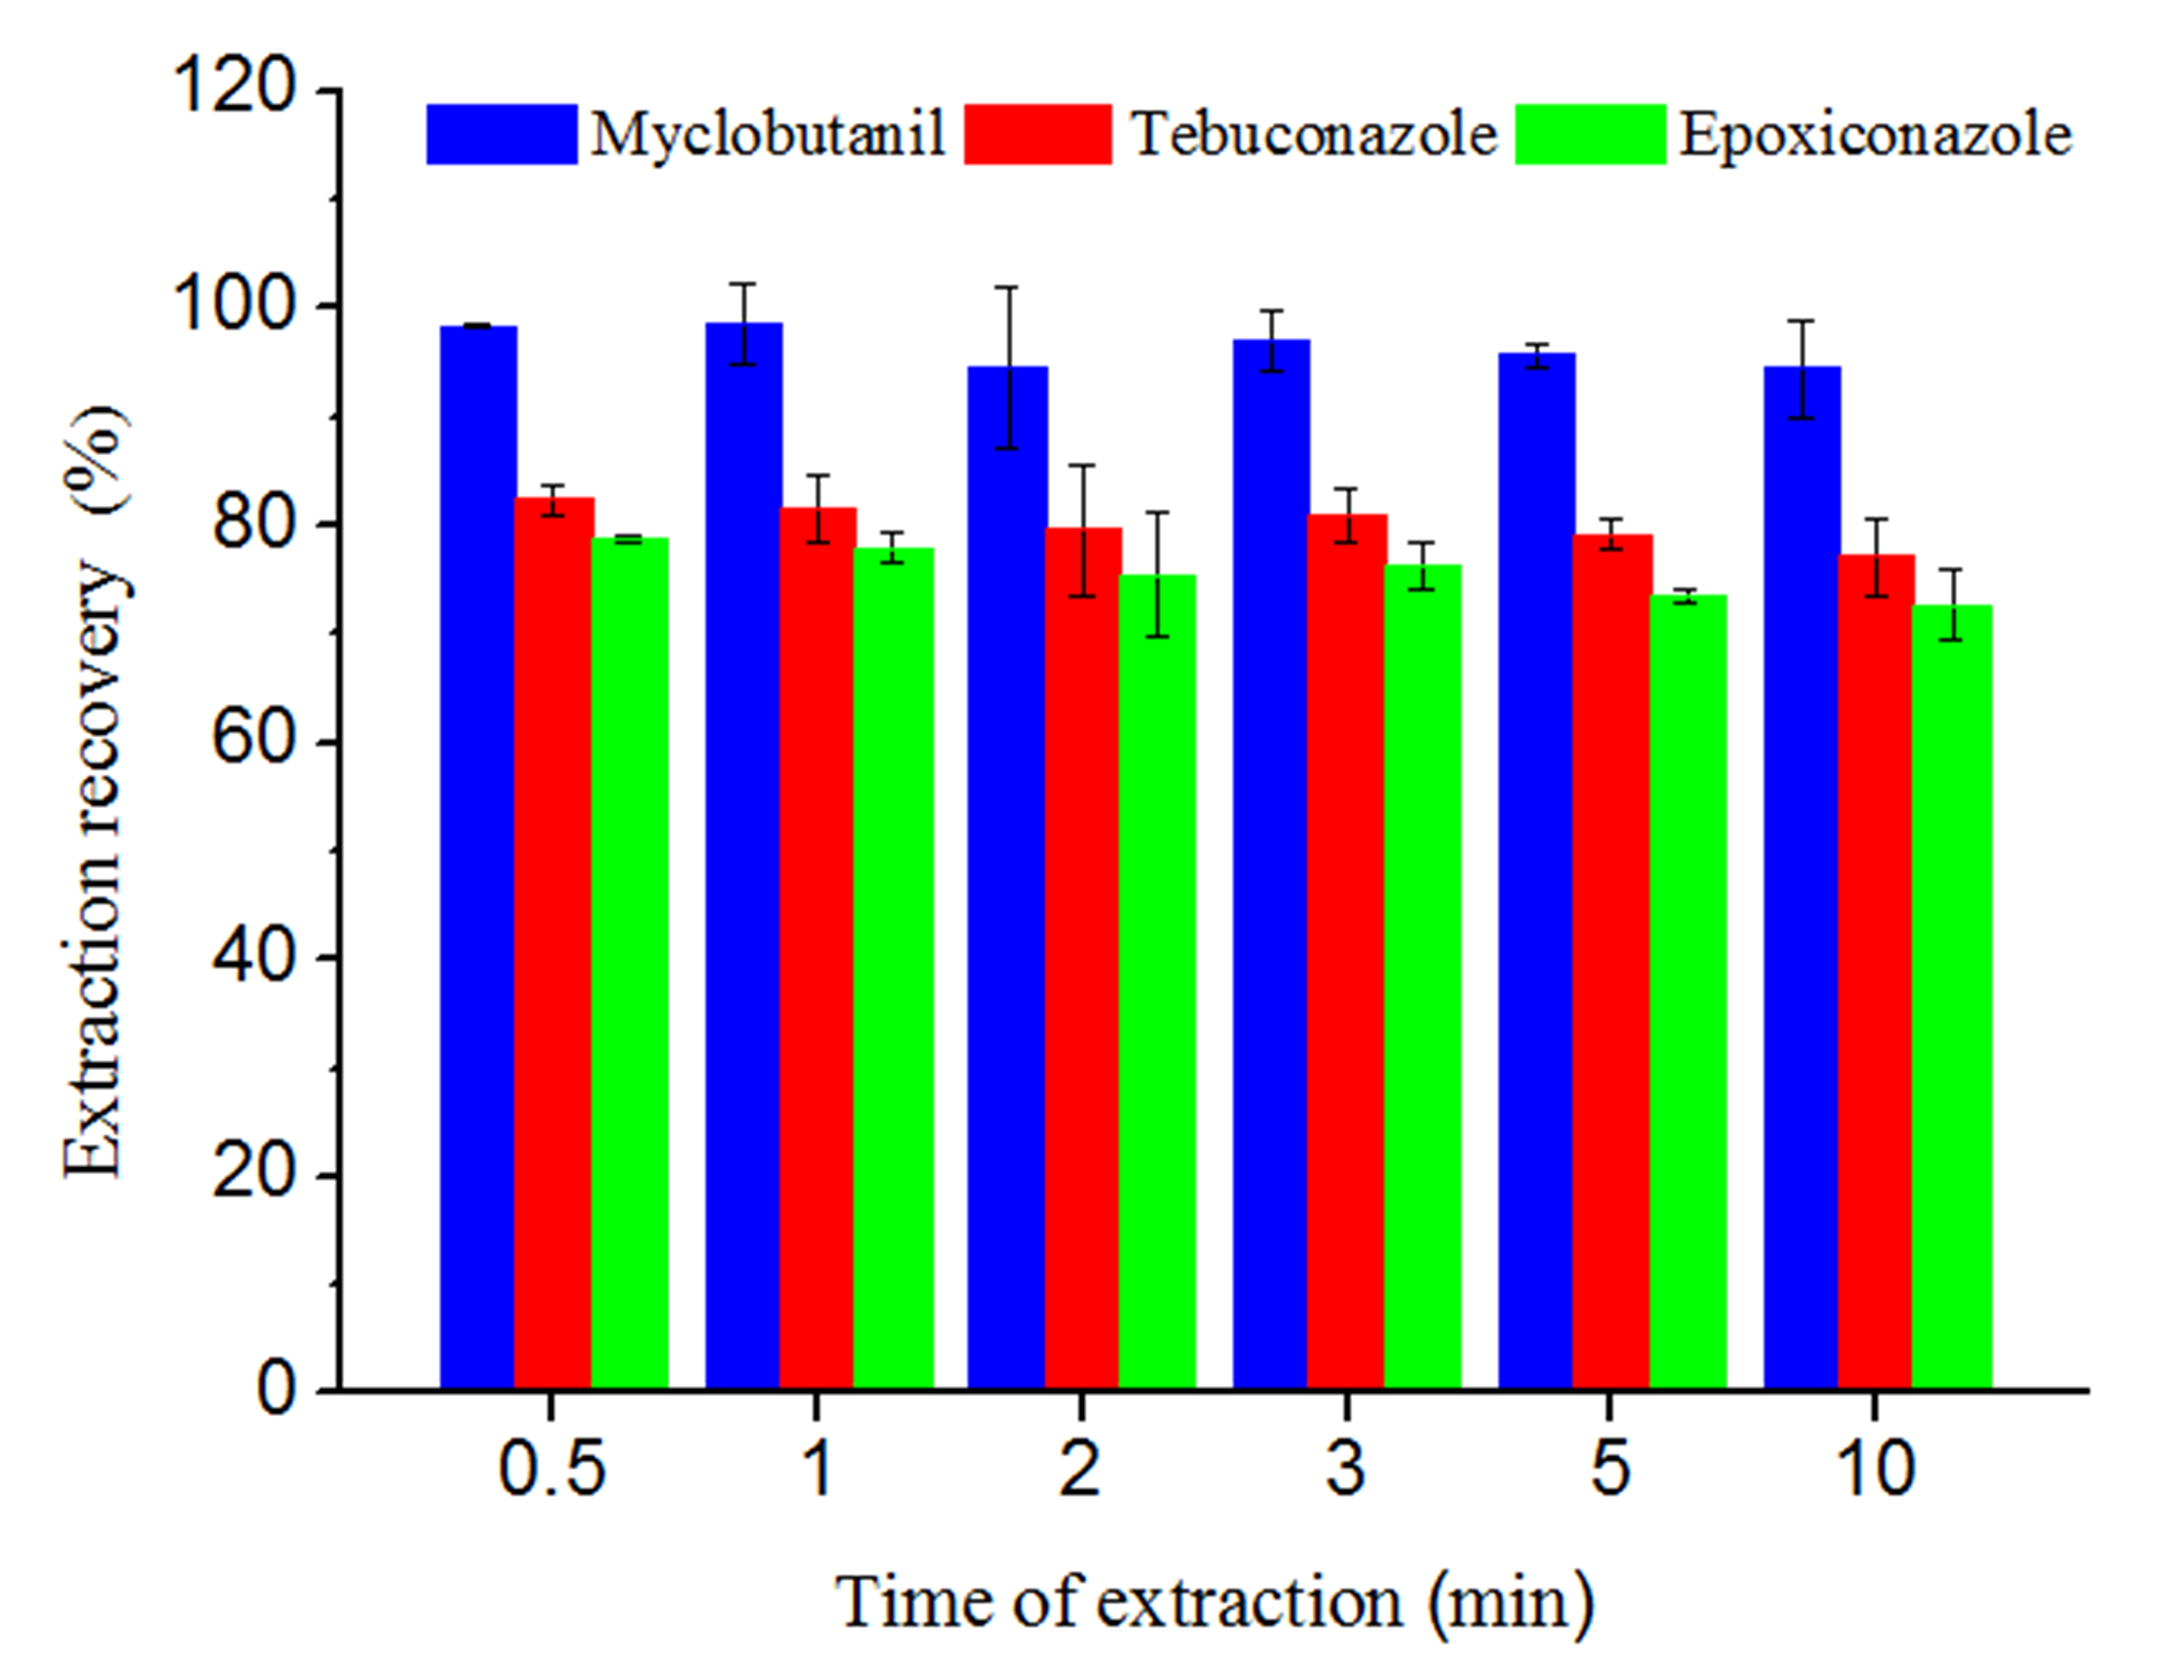


**Figure S4** Effect of extraction time on recovery.


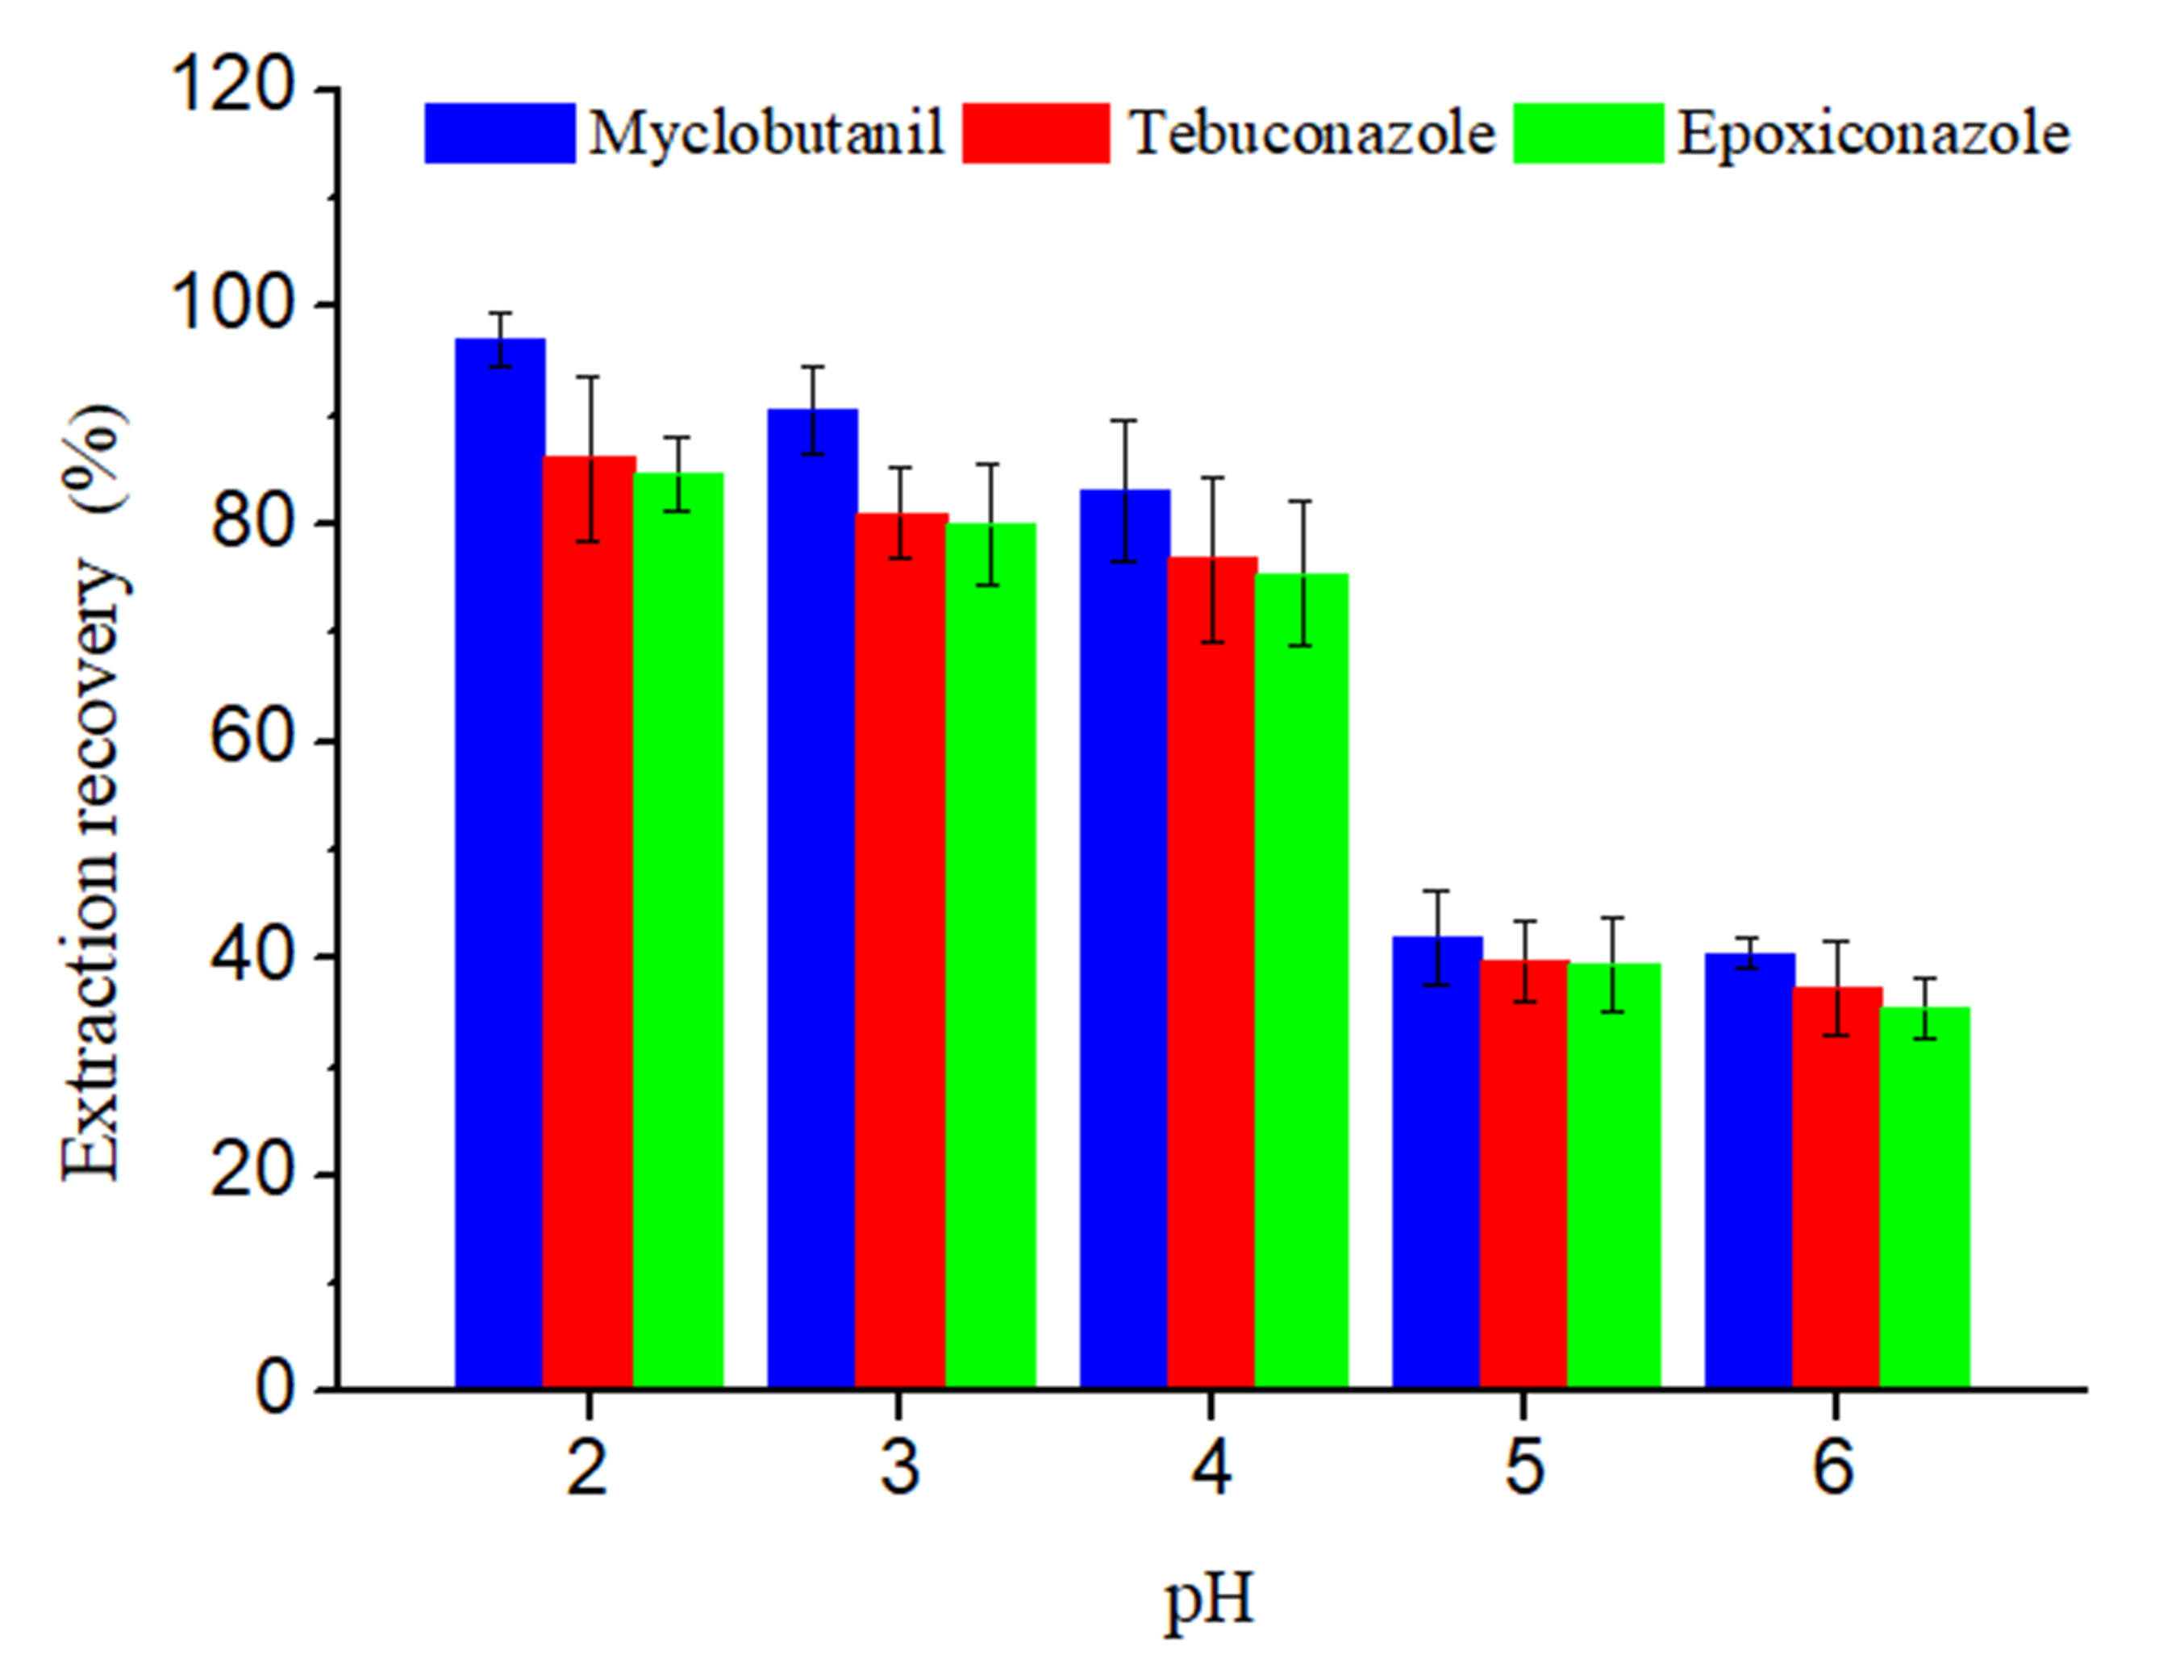


**Figure S5** Effect of pH on recovery.
